# Supplementary material for: Spatio-Temporal Credit Assignment in Neuronal Population Learning
Source: PLOS journal article supplement (doi:10.1371/journal.pcbi.1002092), 2011-06-30
Supplement: S1 (10.1371/journal.pcbi.1002092.s001) [file journal.pcbi.1002092.s001]

301 Moved Permanently

# Moved Permanently

The document has moved here.

---

Apache Server at www.ploscompbiol.org Port 80
